# Supplementary material for: Performance enhancement of perovskite solar cells via material quality improvement assisted by MAI/IPA solution post-treatment
Source: Royal Society of Chemistry journal article supplement (doi:10.1039/c9dt00930b), 2019-01-01
Supplement: c9dt00930b1.pdf [file c9dt00930b1.pdf]

## Supplementary Materials

### Performance Enhancement of perovskite solar cells via the material quality improvement assisted by the MAI/IPA solution post-treatment

Dazheng Chen<sup>a,b,†</sup>, Xueyi Li<sup>a,b,†</sup>, Aixue Su<sup>a</sup>, Shangzheng Pang<sup>a</sup>, Hang Dong<sup>b</sup>, Weidong Zhu<sup>a,b</sup>, He Xi<sup>a,c</sup>, Jincheng Zhang<sup>a,b</sup>, Chunfu Zhang<sup>a,b,\*</sup> and Yue Hao<sup>a</sup>

<sup>a</sup>Wide Bandgap Semiconductor Technology Disciplines State Key Laboratory, School of Microelectronics, Xidian University, Xi'an, 710071.

<sup>b</sup>Shaanxi Joint Key Laboratory of Graphene, Xidian University, Xi'an, 710071.

<sup>c</sup>State Key Laboratory of Crystal Materials, Shandong University, Jinan, 250100, China.

† Two authors have equally contributed to this study.

\*Corresponding author. Email address: cfzhang@xidian.edu.cn.

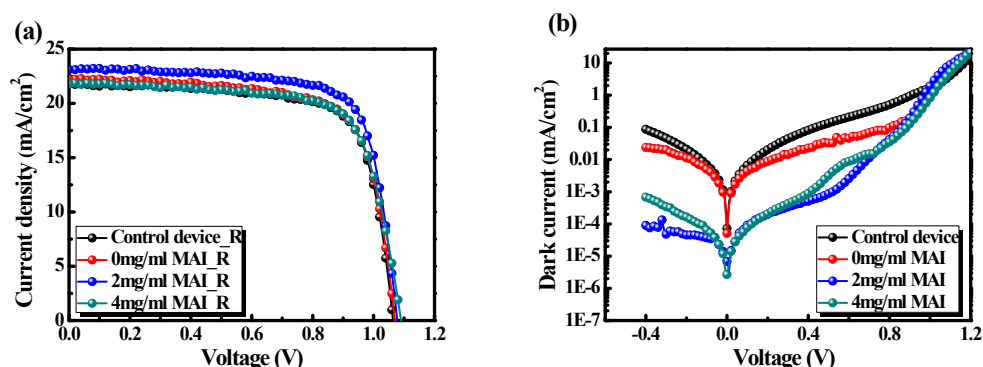

**Fig. S1.** (a) The J-V characteristic curves with/without MAI/IPA solution treatment in reverse scanning. (b) The dark current with/without MAI/IPA solution treatment.

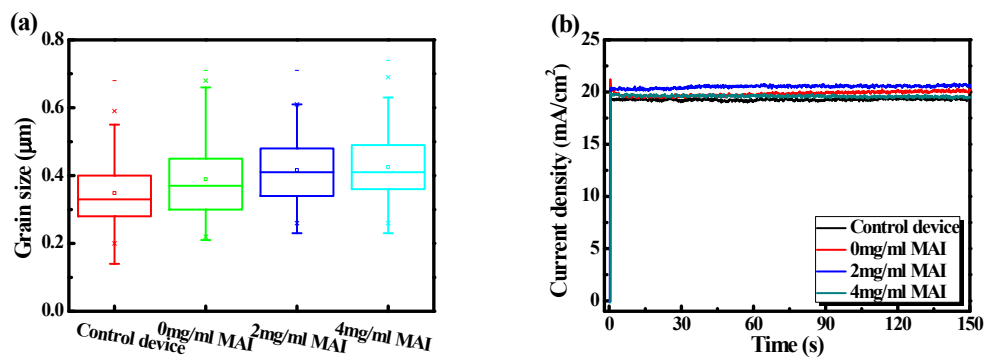

**Fig. S2.** (a) The statistic of grain size of perovskite films in SEM images. (b) Current density steady-state output measurements with/without MAI/IPA solution treatment

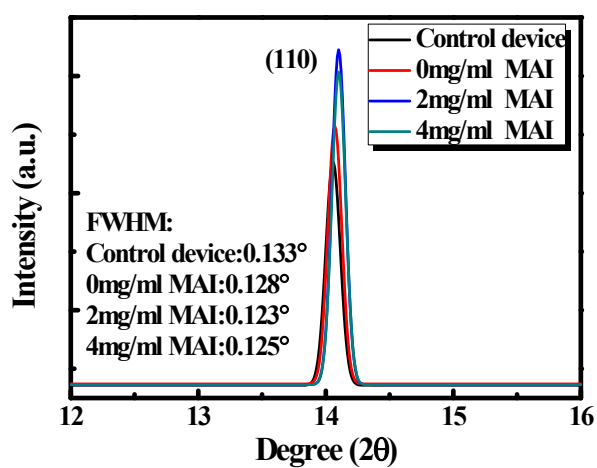

**Fig. S3.** The XRD patterns of ITO/NiO<sub>x</sub>/CH<sub>3</sub>NH<sub>3</sub>PbI<sub>3-x</sub>Cl<sub>x</sub> with/without MAI/IPA solution post-treatment.

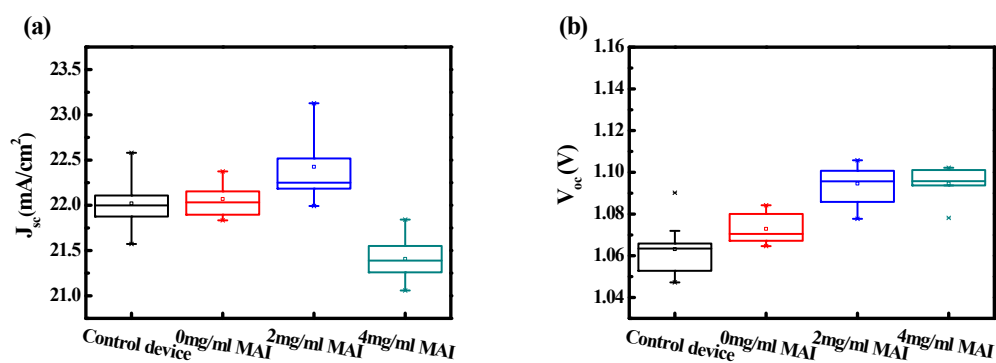

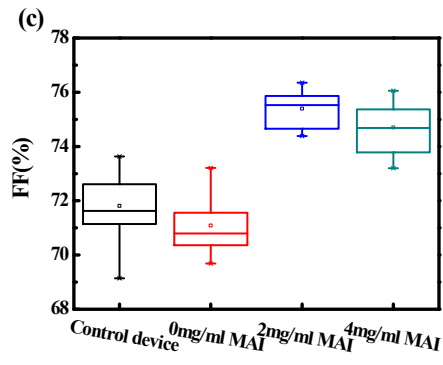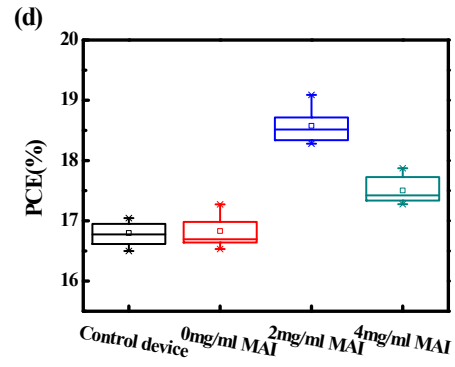

**Fig. S4.** (a) Statistics of  $J_{sc}$  with/without MAI/IPA solution treatment. (b) Statistics of  $V_{oc}$  with/without MAI/IPA solution treatment. (c) Statistics of FF with/without MAI/IPA solution treatment. (d) Statistics of PCE with/without MAI/IPA solution treatment.
